# Supplementary material
Source: PubMed Central journal article supplement (PMC5720861)

# Supplemental Figure 1: Local RFS by margins and era

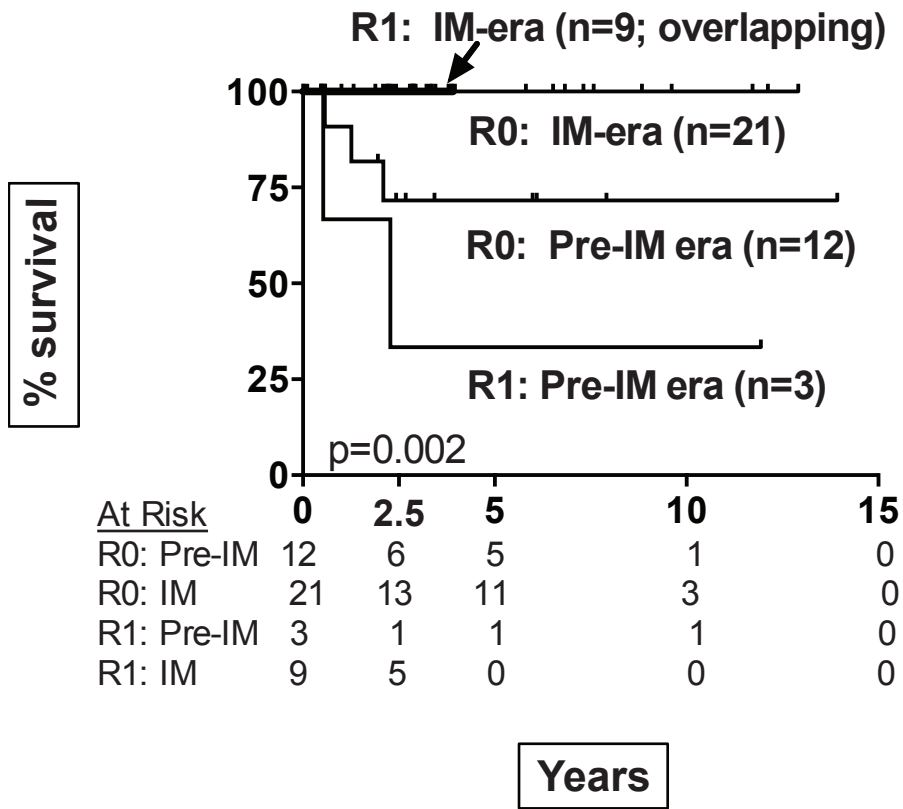

Supplement: NIHMS915603-supplement-1.pdf [file NIHMS915603-supplement-1.pdf]

# Supplemental Figure 2: Algorithm for management of Rectal GIST

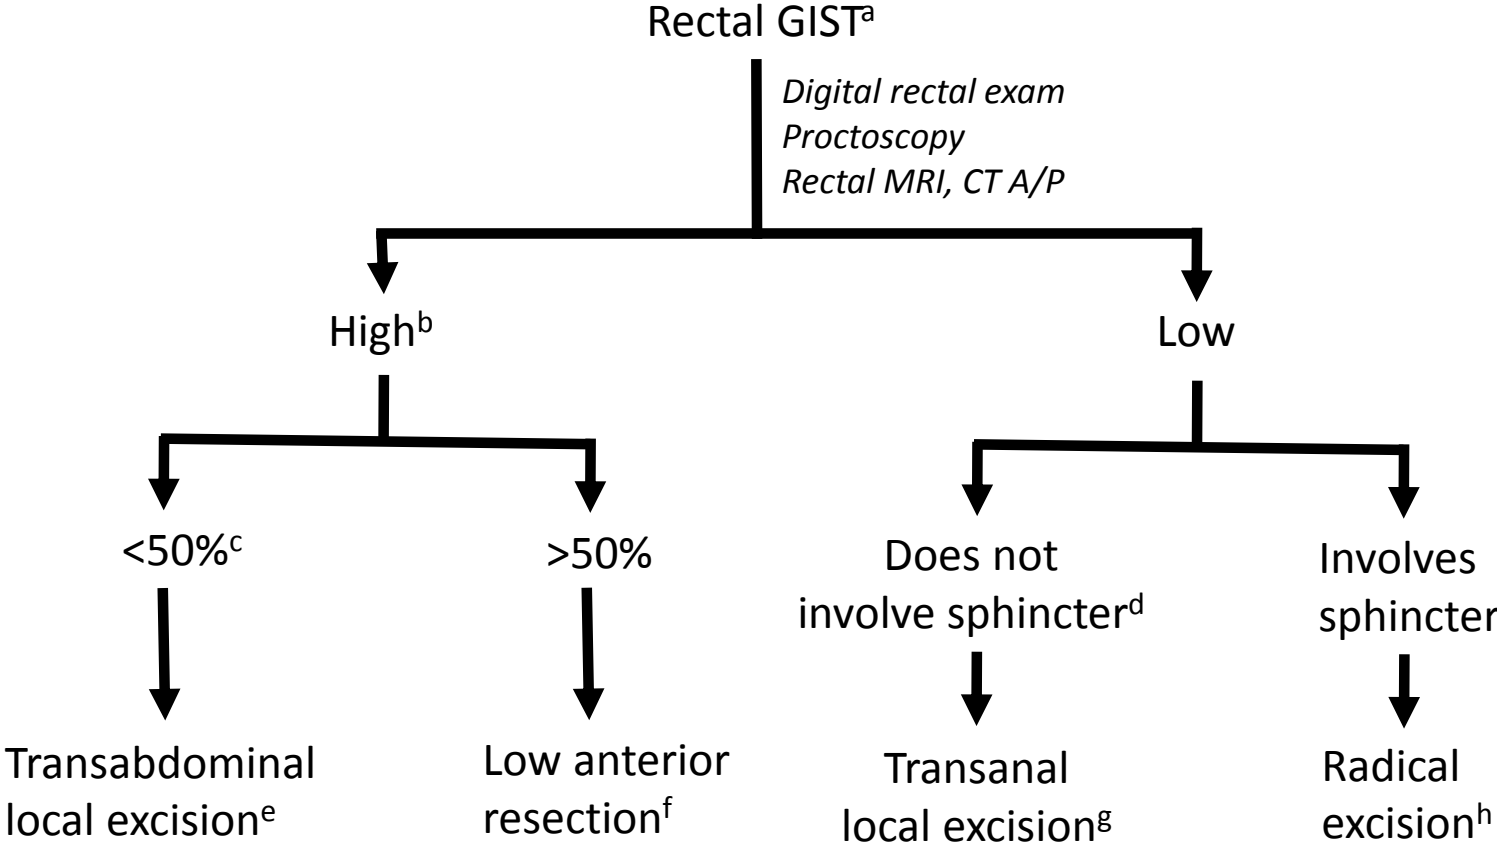

Supplement: NIHMS915603-supplement-2.pdf [file NIHMS915603-supplement-2.pdf]
